# Supplementary material
Source: PubMed Central journal article supplement (PMC3545471)
Supplement: NIHMS189146-supplement-Supp_Figs_Tables.pdf [file NIHMS189146-supplement-Supp_Figs_Tables.pdf]

## SUPPLEMENT MATERIALS

### **Supplement Fig. 1.**

#### **Expression of the 377 miRNAs were readily detectable in surgical tissue specimens.**

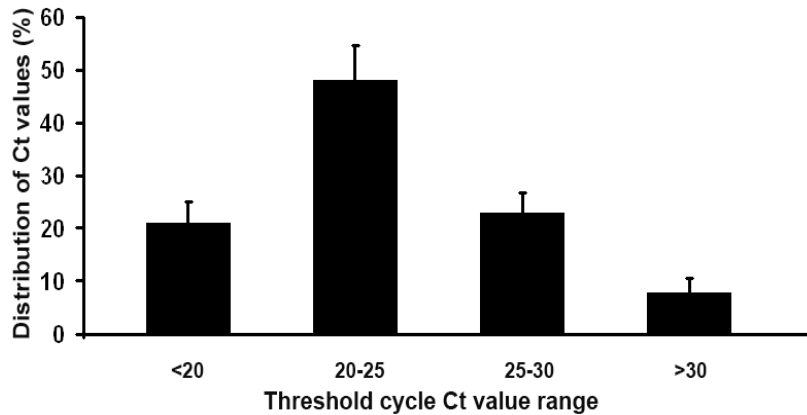

Three hundreds and seventy-seven human miRNAs could easily be measured on the surgically resected lung cancerous tissues and noncancerous lung tissues by real-time PCR-based miRNA array. A TaqMan-based miRNA array (Applied Biosystems, Foster City, CA) was used to profile the mature miRNAs in lung adenocarcinoma and normal lung tissues. To determine if expression of these 377 miRNAs was detectable, two RNA pools of malignant and nonmalignant were prepared containing equal amounts of RNA from 20 samples per group and tested by the miRNA array analysis. Of the 377 genes, 346 (92%) had  $\leq 30$  Ct value, however only 32 (8%) displayed  $>30$  Ct value.

**Supplement Table 1. Demographic and clinical characteristics in a case-control cohort of cancer patients and healthy individuals**

|                  | Lung adenocarcinoma patients (n = 36) | Controls (n = 36) | P-value |
|------------------|---------------------------------------|-------------------|---------|
| Age              | 68.2 (SD 8.4)                         | 66.7 (SD 4.9)     | 0.89    |
| Sex              |                                       |                   |         |
| Female           | 16                                    | 16                |         |
| Male             | 20                                    | 20                |         |
| Race             |                                       |                   |         |
| White            | 26                                    | 26                |         |
| African American | 10                                    | 10                |         |
| Smoking status   |                                       |                   |         |
| Pack-years       | 28.6 (SD 25.9)                        | 28.8 (SD 28.3)    | 0.92    |
| Stage            | All are stage I                       |                   |         |
| Histology        | All are adenocarcinomas               |                   |         |

Abbreviations: SD, standard deviation.

**Supplement Table 2. Annotated miRNAs differentially expressed in lung adenocarcinomas versus normal lung tissues (average fold-change  $\geq 1.0$ ,  $p < 0.01$ )**

| MiRNAs              | Log2 (fold change)  |
|---------------------|---------------------|
| <b>hsa-miR-486</b>  | <b>-2.968319667</b> |
| <b>hsa-miR-145</b>  | <b>-2.660679833</b> |
| <b>hsa-miR-126</b>  | <b>-2.156865167</b> |
| <b>hsa-miR-138</b>  | <b>-1.784505667</b> |
| <b>hsa-miR-139</b>  | <b>-1.735165667</b> |
| <b>hsa-miR-143</b>  | <b>-1.700703535</b> |
| <b>hsa-miR-218</b>  | <b>-1.661419667</b> |
| <b>hsa-miR-150</b>  | <b>-1.618181664</b> |
| <b>hsa-miR-140</b>  | <b>-1.511957436</b> |
| hsa-miR-195         | -1.393894167        |
| hsa-miR-16          | -1.299653167        |
| hsa-let-7b          | -1.141909167        |
| hsa-miR-222         | -1.102005167        |
| hsa-miR-27a         | -1.050386578        |
| hsa-miR-886         | -1.048786558        |
| hsa-miR-10a         | -1.046658586        |
| hsa-miR-376c        | -1.035308517        |
| hsa-miR-30c         | -1.029413167        |
| hsa-miR-99a         | -1.013456167        |
| hsa-miR-30b         | -1.000671167        |
| hsa-miR-501         | 1.066856836         |
| hsa-miR-429         | 1.186442682         |
| hsa-miR-135b        | 1.240513588         |
| hsa-miR-196b        | 1.352369286         |
| <b>hsa-miR-720</b>  | <b>1.508929647</b>  |
| <b>hsa-miR-92b</b>  | <b>1.538657833</b>  |
| <b>hsa-miR-130b</b> | <b>1.567958333</b>  |
| <b>hsa-miR-31</b>   | <b>1.601236526</b>  |
| <b>hsa-miR-93</b>   | <b>1.682514576</b>  |
| <b>hsa-miR-210</b>  | <b>1.747803333</b>  |
| <b>hsa-miR-200a</b> | <b>1.862715328</b>  |
| <b>hsa-miR-182</b>  | <b>2.217326833</b>  |
| <b>hsa-miR-200b</b> | <b>2.268104167</b>  |
| <b>hsa-miR-21</b>   | <b>2.560514667</b>  |
| <b>hsa-miR-375</b>  | <b>2.891464333</b>  |

The miRNAs with average fold-change  $\geq 1.5$  are given in bold type (Please see the following supplement table 3)

**Supplement Table 3. Annotated miRNAs differentially expressed in lung adenocarcinomas versus normal lung tissues (average fold-change  $\geq 1.5$ ,  $p < 0.01$ )**

| MiRNAs              | Log2 (fold change)  |
|---------------------|---------------------|
| <b>hsa-miR-486</b>  | <b>-2.968319667</b> |
| <b>hsa-miR-145</b>  | <b>-2.660679833</b> |
| <b>hsa-miR-126</b>  | <b>-2.156865167</b> |
| hsa-miR-138         | -1.784505667        |
| hsa-miR-139         | -1.735165667        |
| hsa-miR-143         | -1.700703535        |
| hsa-miR-218         | -1.661419667        |
| hsa-miR-150         | -1.618181664        |
| hsa-miR-140         | -1.511957436        |
| hsa-miR-720         | 1.508929647         |
| hsa-miR-92b         | 1.538657833         |
| hsa-miR-130b        | 1.567958333         |
| hsa-miR-31          | 1.601236526         |
| hsa-miR-93          | 1.682514576         |
| hsa-miR-210         | 1.747803333         |
| hsa-miR-200a        | 1.862715328         |
| <b>hsa-miR-182</b>  | <b>2.217326833</b>  |
| <b>hsa-miR-200b</b> | <b>2.268104167</b>  |
| <b>hsa-miR-21</b>   | <b>2.560514667</b>  |
| <b>hsa-miR-375</b>  | <b>2.891464333</b>  |

The seven miRNAs with average fold-change  $\geq 2.0$  are given in bold type.

**Supplement Fig. 2. Expression of the miRNAs can sensitively be detected in sputum.**

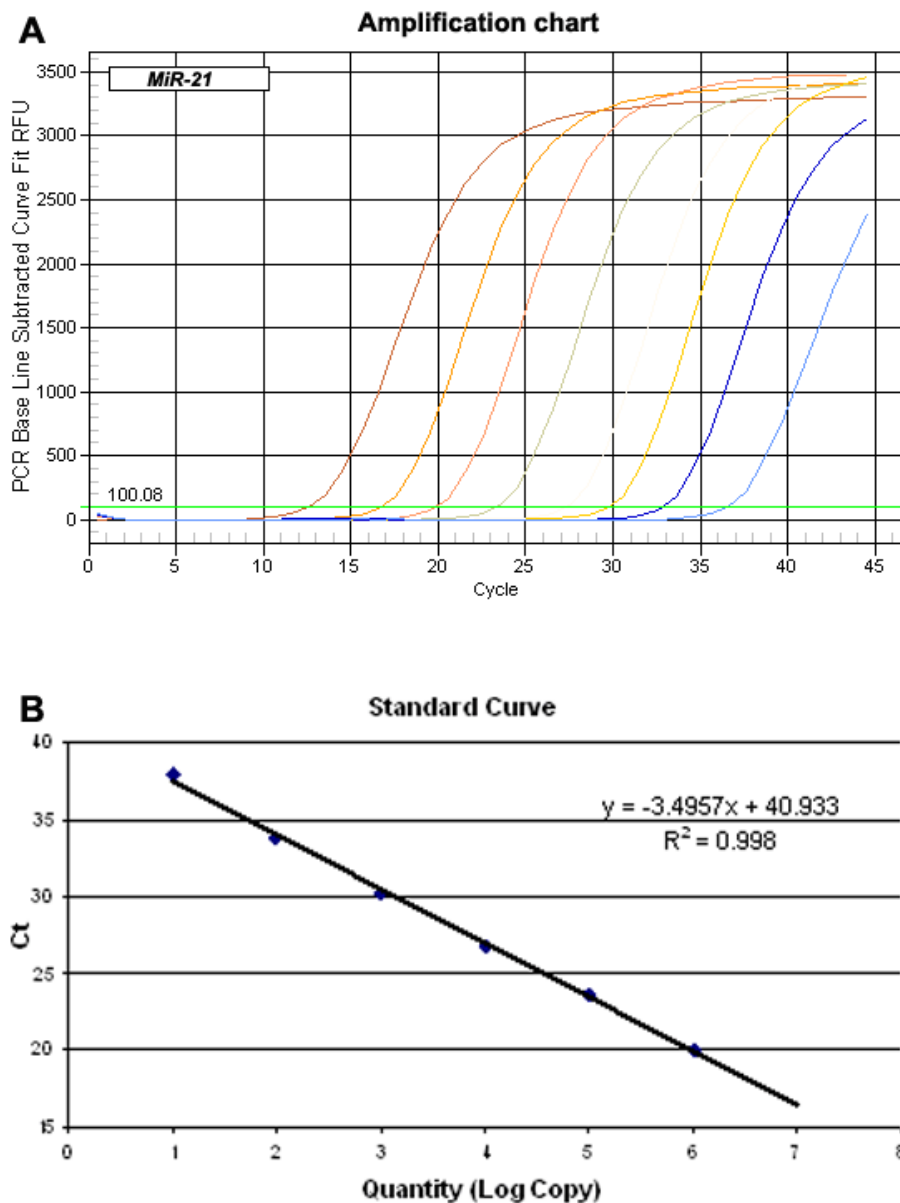

To determine whether the seven newly identified miRNAs can be specifically and reliably detected in sputum specimens. Two RNA pools containing equal amounts of RNA from sputum samples of 36 cancer patients and 36 cancer-free individuals were prepared, respectively. A. To determine the sensitivity of detecting the miRNAs by RT-qPCR in sputum, the total RNA was serially diluted in DEPC water. Amplification plot of total RNA from sputum specimen at seven orders of magnitude was made for the detection of *miR-21*. B. Correlation of total RNA input with the threshold of cycle (Ct) values for *miR-21* assay ( $R^2 = 0.998$ , slope = -3.496). The assays were performed on the sputum samples for all seven miRNAs. The supplement Fig. 2 only shows the results of *miR-21*. All experiments were done in triplicates.

**Supplement Fig. 3. The combination of the four miRNAs display higher specificity and specificity in the identification of lung adenocarcinoma compared with a single one used a lone.**

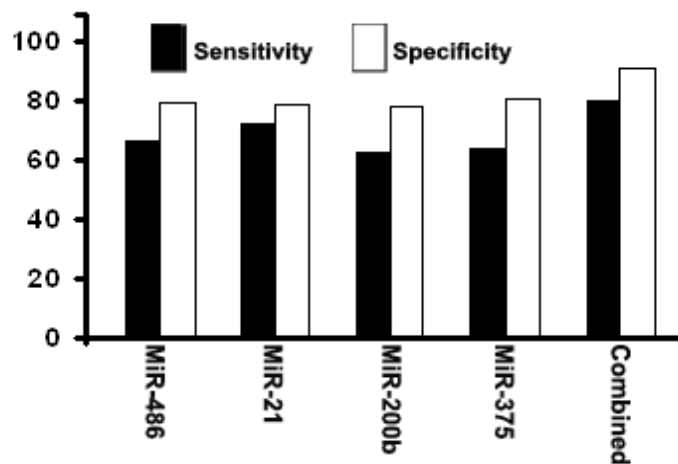

Comparison of four miRNAs individually and the four miRNAs combined in identification of lung adenocarcinoma patients in a case-control cohort of 36 patients diagnosed with stage I lung adenocarcinoma and 36 health subjects. The four miRNAs in combination produced a sensitivity of 80.6% and a specificity of 91.7%, being statistically higher than 59.5-72.6% sensitivity and 73.8-82.9% specificity of the individual miRNAs (All  $p < 0.05$ ).

**Supplement Table 4. Expression levels of the four miRNAs and their diagnostic significance in sputum of 64 NSCLC patients and 58 healthy controls**

| MiRNA genes     | Mean (SD) in NSCLC patients | Mean (SD) in controls | P*     | AUC* (SE)     | Sensitivity (%) | Specificity (%) |
|-----------------|-----------------------------|-----------------------|--------|---------------|-----------------|-----------------|
| <i>MiR-486</i>  | 0.049 (0.046)               | 0.193 (0.168)         | <0.001 | 0.727 (0.030) | 62.6            | 69.4            |
| <i>MiR-21</i>   | 6.198 (4.891)               | 2.823 (1.289)         | <0.001 | 0.752 (0.038) | 58.8            | 73.8            |
| <i>MiR-200b</i> | 5.368 (4.562)               | 2.642 (1.873)         | <0.001 | 0.789 (0.027) | 55.1            | 72.2            |
| <i>MiR-375</i>  | 6.381 (5.001)               | 2.992 (1.654)         | <0.001 | 0.713 (0.026) | 60.3            | 71.7            |
| All four miRNAs |                             |                       |        | 0.839 (0.049) | 70.3            | 80              |

Abbreviations: NSCLC: non-small-cell lung cancer; SD, standard deviation; AUC, the area under receiver operating characteristic curve; SE, standard error.

\*Both the P value and AUC were obtained using the *U6*-normalized values

**Supplement Table 5. Association of the miRNA expressions with clinical and demographic characteristics of the NSCLC patients**

| Characteristics         | MiRNA, OR (95% CI), P*           |                                  |                                  |                                  |
|-------------------------|----------------------------------|----------------------------------|----------------------------------|----------------------------------|
|                         | <i>MiR-486</i>                   | <i>MiR-21</i>                    | <i>MiR-200b</i>                  | <i>MiR-375</i>                   |
| Age                     | 0.66 (0.30 to 1.46), 0.29        | 0.78 (0.36 to 2.00), 0.59        | 0.65 (0.27 to 1.48), 0.28        | 0.67 (0.25 to 1.28), 0.19        |
| Gender                  | 1.65 (0.88 to 3.26), 0.12        | 1.62 (0.83 to 3.26), 0.18        | 1.57 (0.82 to 3.13), 0.19        | 1.34 (0.65 to 2.80), 0.39        |
| Ethnic group            | 1.39 (0.69 to 2.84), 0.37        | 1.68 (0.83 to 3.63), 0.18        | 1.71 (0.34 to 3.87), 0.19        | 1.35 (0.67 to 2.83), 0.56        |
| Smoking status          | 1.36 (0.55 to 3.28), 0.57        | 1.26 (0.48 to 3.45), 0.58        | 1.40 (0.56 to 3.48), 0.48        | 1.46 (0.53 to 3.28), 0.49        |
| Tumor histological type | 2.52 (1.23 to 5.29), <b>0.02</b> | 2.70 (1.83 to 5.57), <b>0.01</b> | 2.55 (0.97 to 4.95), <b>0.03</b> | 2.37 (1.86 to 4.97), <b>0.03</b> |
| Tumor location          | 2.91 (1.55 to 6.12), <b>0.03</b> | 2.64 (1.35 to 5.69), <b>0.01</b> | 2.63 (0.10 to 5.15), <b>0.01</b> | 2.20 (1.23 to 4.85), <b>0.05</b> |
| Stage                   | 1.95 (0.99 to 3.78), 0.07        | 1.67 (0.84 to 3.28), 0.16        | 1.46 (0.76 to 2.77), 0.28        | 1.58 (0.84 to 2.96), 0.18        |

Abbreviations: NSCLC, non-small cell lung cancer; OR = odds ratio; CI = confidence interval.

\*Univariate analysis. All P values are two-sided, and  $P \leq 0.05$  was considered statistically significant and given in bold type.

**Supplement Table 6. Association of the miRNA expressions with demographic characteristics of the healthy subjects**

| Demographic characteristics | MiRNA, OR (95% CI), P*    |                           |                           |                           |
|-----------------------------|---------------------------|---------------------------|---------------------------|---------------------------|
|                             | <i>MiR-486</i>            | <i>MiR-21</i>             | <i>MiR-200b</i>           | <i>MiR-375</i>            |
| Age                         | 0.62 (0.27 to 1.52), 0.26 | 0.67 (0.35 to 2.28), 0.62 | 0.67 (0.26 to 1.62), 0.29 | 0.69 (0.26 to 1.22), 0.15 |
| Gender                      | 1.68 (0.84 to 3.27), 0.19 | 1.64 (0.86 to 3.21), 0.16 | 1.50 (0.86 to 3.37), 0.22 | 1.36 (0.64 to 2.34), 0.34 |
| Ethnic group                | 1.32 (0.62 to 2.85), 0.36 | 1.63 (0.81 to 3.60), 0.17 | 1.65 (0.32 to 3.85), 0.16 | 1.38 (0.63 to 2.92), 0.59 |
| Smoking status              | 1.66 (0.58 to 3.25), 0.64 | 1.28 (0.39 to 3.49), 0.64 | 1.48 (0.48 to 3.42), 0.46 | 1.50 (0.56 to 3.33), 0.45 |

Abbreviations: OR = odds ratio; CI = confidence interval.

\*Univariate analysis. All P values are two-sided, and  $P \leq 0.05$  was considered statistically significant.
